# Supplementary material for: Effects of preservation methods of muscle tissue from upper-trophic level reef fishes on stable isotope values (δ13C and δ15N)
Source: PeerJ. 2015 Mar 26;3:e874. doi: 10.7717/peerj.874 (PMC4380155; doi:10.7717/peerj.874)
Supplement: Supplemental Information 1 [file peerj-03-874-s001.xlsx]

## Sheet: Sheet1
		LN	LN	LN	Ice	Ice	Ice	OH	OH	OH	salt	salt	salt
Species	TL (mm)	d15N NIST 8573/8574 corrected (AT-Air)	d13C NIST 8573/8574 corrected (VPDB)	C:N (molar)	d15N NIST 8573/8574 corrected (AT-Air)	d13C NIST 8573/8574 corrected (VPDB)	C:N (molar)	d15N NIST 8573/8574 corrected (AT-Air)	d13C NIST 8573/8574 corrected (VPDB)	C:N (molar)	d15N NIST 8573/8574 corrected (AT-Air)	d13C NIST 8573/8574 corrected (VPDB)	C:N (molar)
E. morio	430	11.6112	-16.0378	3.75	11.7636	-15.7013	3.94	12.0249	-15.4258	3.48	12.0788	-16.0548	3.74
E. morio	419	11.1801	-16.244	3.78	11.3993	-16.123	3.61	11.3049	-15.8632	3.6	11.6333	-15.9951	3.92
E. morio	415	11.2888	-16.1849	3.7	11.6613	-16.1193	3.99	11.7769	-15.7018	3.57	11.6092	-16.6244	3.69
E. morio	456	11.2206	-15.5833	3.42	11.5221	-15.3398	3.92	12.2409	-15.5648	3.75	11.3755	-15.736	3.17
E. morio	388	11.3489	-16.0427	3.61	11.1912	-16.0483	3.9	11.8457	-15.5228	3.87	11.2476	-15.8388	3.67
E. morio	360	11.1889	-16.8369	3.86	11.2092	-16.667	3.8	11.5419	-15.988	3.61	11.5037	-16.9298	3.61
E. morio	458	11.4575	-16.2072	3.87	11.5308	-16.4214	3.65	11.7196	-15.849	3.57	11.9295	-16.1271	3.8
E. morio	586	12.0374	-16.9844	3.83	12.1019	-16.5222	3.5	12.3684	-15.7855	3.78	12.3132	-16.2895	3.78
E. morio	532	12.0577	-17.438	3.81	11.6092	-17.6524	3.62	12.515	-16.9583	3.7	12.2053	-17.3852	3.91
E. morio	492	12.0149	-17.6535	3.66	11.8649	-17.5019	3.87	12.4028	-17.3984	3.9	12.1906	-17.6393	3.67
E. morio	567	12.0554	-16.6924	3.89	12.0249	-16.7238	3.65	12.7229	-16.3646	3.66	12.5994	-16.2613	3.94
E. morio	632	12.1697	-16.5566	3.74	12.2332	-16.8056	3.64	12.9347	-15.7521	3.87	12.6916	-16.1203	3.76
E. morio	590	11.3837	-16.7738	3.65	11.6704	-16.3628	3.8	11.8663	-16.124	3.67	12.2057	-16.4742	3.53
E. morio	580	11.648	-16.5931	3.69	12.2779	-16.4424	3.59	12.7787	-16.0726	3.92	12.4869	-16.3455	3.8
E. morio	643	12.0972	-17.145	3.8	12.1303	-16.9052	3.51	12.7756	-16.3475	3.75	12.5169	-17.0261	3.59
E. morio	735	12.7028	-16.6305	3.66	12.6247	-15.8789	3.58	12.9188	-16.0266	3.58	13.192	-16.4084	3.86
E. morio	529	11.5985	-16.875	4.03	11.3676	-16.7504	4.04	12.2056	-16.0328	3.71	11.9683	-16.575	3.71
E. morio	723	12.1638	-16.3059	3.9	11.7231	-16.3079	3.89	12.531	-15.8416	3.59	12.1688	-16.1555	3.94
E. morio	635	12.4632	-16.4948	3.45	12.7008	-16.9877	3.88	12.8707	-16.2226	3.54	12.9056	-16.6032
E. morio	755	11.891	-16.0619	3.77	12.3519	-16.51	3.56	12.4814	-16.1911	3.52	12.4415	-16.4464	3.7
E. morio	546	12.0017	-16.6569	3.9	11.9562	-17.4715	3.83				12.3082	-16.846	3.95
E. morio	752	12.2721	-16.7169	3.79	12.4535	-16.238	4.17	12.8476	-16.5582	3.87	12.8498	-16.1881	3.65
E. morio	666	12.5241	-16.8405	3.63	12.736	-16.8608	3.81	13.2737	-16.6579	3.71	13.4196	-16.4731	3.96
E. morio	764	12.9084	-16.876	4.01	13.0652	-16.5867	3.77	13.1232	-16.6558	3.72	12.8576	-16.5074	3.75
L. campechanus	565	11.6011	-18.1863	3.82	12.1455	-17.5881	4.08	12.3051	-17.76	3.64	12.2439	-17.964	3.76
L. campechanus	594	11.5686	-17.9615	3.7	11.5185	-18.4778	4.12	11.8301	-17.7123	3.68	11.6674	-18.2238	3.85
L. campechanus	654	11.2858	-18.1934	3.7	11.4249	-17.8519	3.9	11.8361	-17.8392	3.81
L. campechanus	637	11.0012	-18.1655	3.71	11.4037	-18.16	3.91			3.63	11.8281	-18.1883	3.77
L. campechanus	637	12.0888	-17.3477	3.89	12.1546	-17.4613	3.87	12.3473	-17.619	3.67	12.2519	-17.7478	3.88
L. campechanus	656	11.1953	-18.3246	3.94	11.11	-18.2979	3.62	11.4698	-18.4199	4.09	11.3554	-18.286	3.7
L. campechanus	769	11.0708	-18.2177	4.12	11.0287	-18.1966	3.96	11.4669	-19.0631	4.55	11.4668	-18.5092	3.92
L. campechanus	687	11.3912	-18.374	3.54	11.8934	-18.1709	3.77	11.79	-17.6967	3.98	11.6461	-18.1592	4
L. campechanus	711	11.2315	-18.1203	3.77	11.3407	-17.7378	3.72	12.1059	-17.9002	3.98	11.6785	-17.7766	3.84
L. campechanus	608	11.8264	-17.6987	3.86	11.8973	-17.6499	3.78	12.0033	-17.6576	3.77	12.0027	-17.5273	3.81
L. campechanus	794	10.8991	-18.2868	3.75	11.3371	-18.2921	3.98	11.5742	-18.5021	4.1	11.2611	-18.357	4.07
L. campechanus	725	11.5894	-17.9777	3.89	11.6157	-17.4664	4.07	14.2152	-16.698	3.76	11.6728	-17.8672	4.14
L. campechanus	671	11.3315	-18.2119	3.93	11.1591	-18.0461	3.72	12.0509	-17.702	3.7	11.6444	-18.1305	3.84
L. campechanus	701	10.8488	-18.0997	3.67	11.2958	-18.4502	3.96	11.4629	-18.2241	3.69	11.6424	-18.0014	3.95
L. campechanus	546	11.7467	-17.9525	3.53	11.4689	-18.2587	3.84	12.0311	-17.4106	3.93	12.0775	-18.0329	4.09
L. campechanus	662	10.9987	-18.0902	4.26	11.2892	-18.3497	3.65	11.718	-18.0872	4.17	11.5481	-21.4226	3.7
L. campechanus	773	11.6855	-18.0209	3.67	11.5441	-17.5834	3.79	12.3898	-17.746	3.74	12.1758	-17.9607	3.67
L. campechanus	625	11.3817	-18.219	3.71	10.9386	-18.1999	3.7	11.6905	-17.8987	3.79	11.6162	-18.034	3.75
L. campechanus	766	11.8904	-17.8737	3.61	11.7677	-17.8885	3.74	12.3252	-17.4929	3.65	12.3053	-17.6295	3.6
L. campechanus	751	11.7277	-18.0127	3.66	11.6552	-18.144	4.12	12.3792	-18.9237	4.25	11.6093	-17.5406	3.94
M. microlepsis	500	11.9733	-16.5281	3.81	12.3036	-16.2978	3.85	12.4708	-16.2052	3.61	12.275	-16.5807	3.71
M. microlepsis	577	12.4018	-16.0087	3.77	12.4305	-16.0972	3.85	12.8073	-16.805	3.56	12.5251	-16.3351	3.96
M. microlepsis	755	12.9328	-16.596	3.63	13.3338	-16.1588	3.96	13.3998	-15.8257	3.61	13.4108	-16.7847	3.93
M. microlepsis	867	12.6576	-16.9684	3.55	12.5811	-16.8537	3.88	13.6519	-17.0038	3.9	13.3727	-17.5682	3.77
M. microlepsis	738	12.5949	-16.1911	3.85	12.3885	-16.0926	4.01	13.2502	-15.5669	3.57	13.3235	-15.778	3.83
M. microlepsis	1020	13.5304	-17.0363	4.08	13.6692	-16.5808	3.88	14.1504	-16.7127	3.85	14.0582	-16.8527	4.08
M. microlepsis	840	12.7962	-17.8514	3.77	12.8537	-16.1264	4.15	13.5555	-15.9556	3.64	13.5395	-16.1659	3.96
M. microlepsis	802	12.9308	-15.8142	3.66	13.2477	-15.9979	3.9	13.657	-15.8565	3.95	13.3085	-15.5979	3.97
M. microlepsis	1090	14.0994	-16.5323	3.67	14.0978	-16.6075	3.8	14.3792	-16.5202	3.59	12.8436	-16.2246	3.79
M. microlepsis	1065	13.9485	-16.6569	3.85	13.8032	-16.5369	3.84	14.5546	-15.9854	3.91	14.0987	-15.5309	3.95
M. microlepsis	916	13.3048	-16.5592	3.89	13.7826	-16.9389	4.02	13.77	-16.5273	3.7	13.7243	-16.6969	3.51
M. microlepsis	651	12.6086	-17.4855	4.15	12.5648	-16.9599	3.71	13.2236	-17.2254	3.91	13.199	-17.3674	3.71
M. microlepsis	828	13.8541	-16.9553	3.74	13.5174	-17.3962	3.9	14.1635	-16.7026	4.02	14.3121	-16.8388	3.71
M. microlepsis	699	13.0473	-15.782	3.58	13.1009	-16.0824	3.7	13.3269	-15.6063	3.65	13.962	-15.7876	6.09
M. microlepsis	935	13.4008	-16.9664	3.68	13.5567	-17.3295	3.89	13.6287	-16.9701	3.94	13.8784	-17.1501	4.15
M. microlepsis	960	13.6995	-16.2897	3.89	13.5997	-17.1044	3.77	13.9947	-16.6904	3.76	11.6725	-17.6281	3.75
M. microlepsis	1060	13.7162	-16.2987	3.36	13.6798	-16.9569	3.82	14.5247	-16.2249	3.64	13.615	-16.0818	3.66
M. microlepsis	826	13.5153	-16.5056	3.65	13.6137	-16.0965	3.73	14.2415	-16.2744	3.51	14.281	-16.509	3.58
M. microlepsis	840	12.0982	-17.1947	3.68	12.1486	-16.989	3.82	12.5779	-16.6365	3.61	12.6757	-16.0459	3.61
M. phenax	566	12.7244	-17.6224	3.5	12.9387	-17.2412	3.86	13.3098	-17.0901	3.91	13.1049	-17.3081	3.81
M. phenax	512	12.8205	-18.0551	3.65	12.4498	-17.938	3.57	12.9813	-17.2818	4	12.9814	-17.8682	3.72
M. phenax	542	12.6541	-17.7146	3.8	12.8075	-17.7227	3.73	13.2264	-17.4456	3.56	13.2275	-17.3437	3.94
M. phenax	630				13.0604	-17.3036	3.91	13.4983	-17.0769	3.77	13.5583	-17.4253	3.77
M. phenax	578	12.8283	-17.227	3.94	12.4937	-17.7003	3.73	13.1063	-17.1257	3.75	13.5644	-17.6051	3.66
M. phenax	597	12.1307	-17.0667	3.77	12.4285	-17.5152	3.77	13.5108	-17.0058	3.63	12.9559	-17.2345	3.66
M. phenax	-	12.9874	-17.6571	3.72	12.5353	-17.1402	3.41	13.2266	-17.2945	3.73	12.6788	-17.1146	3.59
M. phenax	552	12.4626	-17.3832	3.91	12.8055	-17.4593	3.79	13.2517	-17.3464	3.8	13.004	-18.0014	4.06
M. phenax	664	12.7503	-17.7003	3.84	12.9561	-17.2618	3.5	13.3402	-17.1841	3.6	13.2557	-17.3078	3.74
M. phenax	588	12.5729	-17.3037	3.85	12.7083	-17.4783	3.54	13.1805	-17.0799	3.62	12.8837	-17.7634	3.83
M. phenax	520	12.2039	-18.0817	3.78	12.1576	-18.0175	3.46	13.209	-17.4946	3.59	13.2242	-17.5049	3.73
M. phenax	-	11.5527	-17.1339	3.84	11.4806	-16.9544	3.62	2133	3096	3.26	11.8022	-17.0974	4.32
M. phenax	-	11.8764	-17.5569	3.8	12.0407	-17.5437	3.63	12.5727	-17.1704	3.68	12.3643	-17.4362	3.88
M. phenax	-	11.9555	-17.8663	3.66	12.1599	-17.7871	3.8	12.687	-17.4757	3.74	12.4705	-17.6319	3.83
M. phenax	-	11.0618	-17.7719	3.59	11.0958	-17.8013	3.62	11.5337	-17.4686	3.71	11.5337	-17.6867	3.61
